# Supplementary material for: Environmental Disturbances Decrease the Variability of Microbial Populations within Periphyton
Source: PubMed Central journal article supplement (PMC5072133; doi:10.1128/msystems.00013-16), 2016-05-17
Supplement: sys003162022sf4.pdf [file sys003162022sf4.pdf]

| T0 (Day 1)                                                                                  |                                                                                             |                      | T1 (Day 20)                                                                                 |                                                                                             |                      | T2 (Day 25)                                                                                   |                                                                                               |
|---------------------------------------------------------------------------------------------|---------------------------------------------------------------------------------------------|----------------------|---------------------------------------------------------------------------------------------|---------------------------------------------------------------------------------------------|----------------------|-----------------------------------------------------------------------------------------------|-----------------------------------------------------------------------------------------------|
| 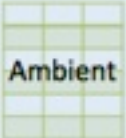 Ambient   |  Ambient   | <b>Randomization</b> |  Ambient   |  Ambient   | <b>Randomization</b> |  Ambient   |  Ambient   |
|  Ambient |  Ambient |                      |  Scoured |  Scoured |                      |  Scoured |  Scoured |
|  Ambient |  Ambient |                      |  Depth   |  Depth   |                      |  Depth   |  Depth   |
