# Supplementary material for: Environmental Disturbances Decrease the Variability of Microbial Populations within Periphyton
Source: PubMed Central journal article supplement (PMC5072133; doi:10.1128/msystems.00013-16), 2016-05-17

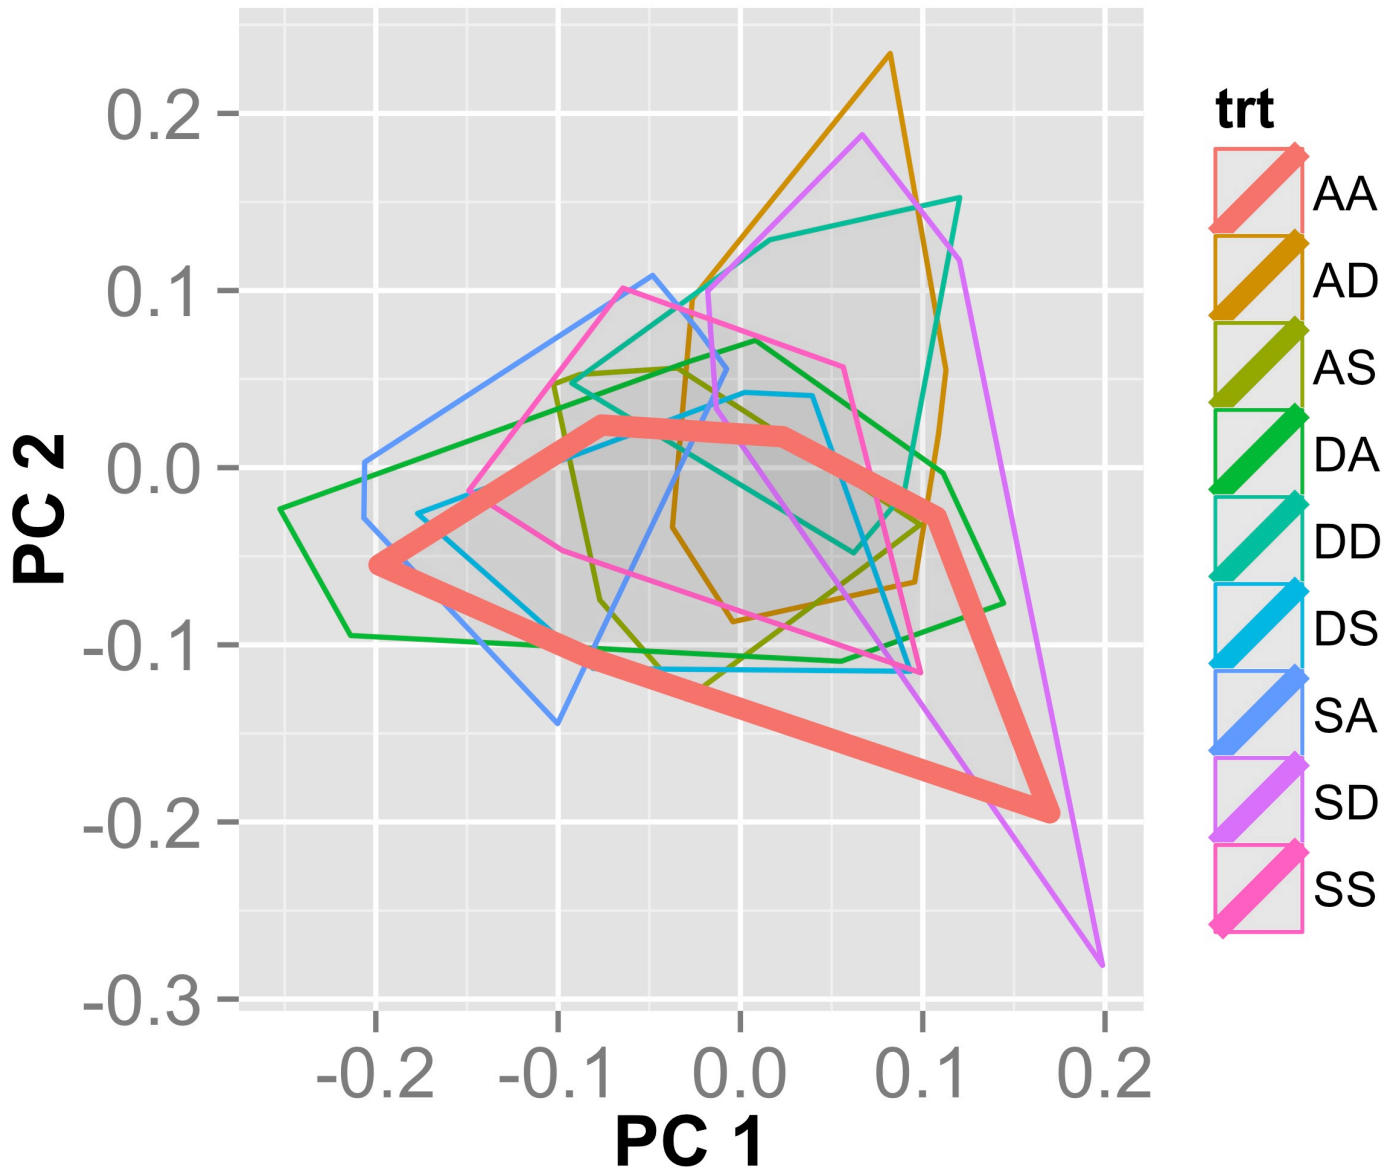

Supplement: sys003162022sf9.pdf [file sys003162022sf9.pdf]
